# Supplementary material
Source: Springer Nature journal article supplement (https://www.springerprofessional.de/resource/supplementary/13638_2012_801_MOESM9_ESM.pdf/11898488)

Comparison for all node-degree constraints

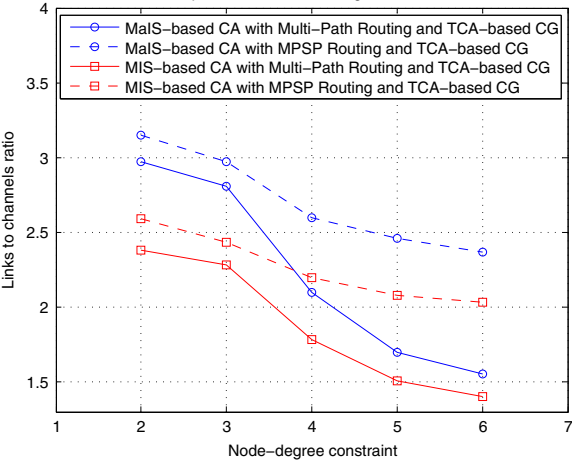

Supplement: MOESM9 [file 11898488]
